# Supplementary material
Source: publisher figshare collection journal article supplement (https://asha.figshare.com/articles/dataset/_/11958771)
Supplement: Supplementary file 1 [file 1]

## Supplemental Material S1.

*Expressive raw scores of participants on trained past-tense verbs within-session*

| Participant ID | B1   | B2   | B3   | B4    | B5    | B6    | B7    | B8    | B9    | B10   | Additional |
|----------------|------|------|------|-------|-------|-------|-------|-------|-------|-------|------------|
| P1             | 7/12 | 6/12 | 9/12 | 8/12  | 3/12  | 10/12 | 9/12  | 11/12 | 11/12 | 8/12  | -          |
| P2             | 6/12 | 9/12 | 8/12 | 7/12  | 7/12  | 11/12 | 10/12 | 11/12 | 9/12  | 12/12 | -          |
| P3             | 2/12 | 8/12 | 7/12 | 10/12 | 11/12 | 9/12  | 11/12 | 12/12 | 11/12 | 10/12 | -          |
| P4             | 7/12 | 9/12 | 8/12 | 8/12  | 8/12  | 11/12 | 11/12 | 10/12 | 8/12  | 10/12 | -          |
| P5             | 3/12 | 2/12 | 2/12 | 9/12  | 8/12  | 10/12 | 7/12  | -     | 10/12 | 8/12  | 9/12       |
| P6             | 1/12 | 2/12 | 4/12 | 1/12  | 2/12  | 2/12  | 2/12  | -     | 4/12  | 6/12  | 7/12       |
| P7             | 2/12 | 6/12 | 5/12 | -     | 10/12 | 8/12  | 9/12  | 9/12  | 10/12 | 10/12 | 8/12       |
| P8             | -    | 2/12 | 7/12 | 8/12  | 4/12  | 3/12  | 8/12  | 6/12  | 4/12  | 7/12  | 5/12       |
| P9             | 8/12 | 7/12 | 6/12 | -     | 6/12  | 8/12  | 7/12  | 9/12  | 6/12  | 7/12  | 9/12       |
