# Supplementary material
Source: publisher figshare collection journal article supplement (https://asha.figshare.com/articles/dataset/_/11958771)
Supplement: Supplementary file 3 [file 1]

## Supplemental Material S21.

*Summary grammaticality judgment repeated measures baseline versus treatment phase contrasts on untrained possessive 's targets (control measure).*

| Participant ID  | Kendall's <i>S</i> | <i>z</i> score | <i>p</i> value | Tau           | 90% CI       |
|-----------------|--------------------|----------------|----------------|---------------|--------------|
| P1              | -25                | -1.67          | 0.10           | -0.56         | [-1,-0.01]   |
| P2              | 53                 | 2.34           | 0.02*          | 0.65          | [0.19,1]     |
| P3              | 2                  | 0.13           | 0.89           | 0.04          | [-0.50,0.59] |
| P4 <sup>a</sup> | 29                 | 1.28           | 0.20           | 0.36          | [-0.10,0.82] |
| P5              | 0                  | 0              | 1.00           | 0             | [-0.49,0.49] |
| P6              | 3                  | 0.13           | 0.90           | 0.04          | [-0.42,0.50] |
| P7 <sup>a</sup> | -2                 | -0.11          | 0.92           | -0.03         | [-0.53,0.46] |
| P8 <sup>a</sup> | -12                | -0.80          | 0.42           | -0.27         | [-0.82,0.28] |
| P9              | -7                 | -0.37          | 0.71           | -0.11         | [-0.60,0.38] |
|                 |                    |                |                | Aggregated ES |              |
|                 |                    |                |                | .76           | 0.03         |

*Notes.* CI = confidence interval; ES = effect size

\*sig.

<sup>a</sup>unstable baseline corrected
