# Supplementary material
Source: publisher figshare collection journal article supplement (https://asha.figshare.com/articles/dataset/_/11958771)
Supplement: Supplementary file 5 [file 1]

## Supplemental Material S18.

*Summary grammaticality judgment repeated measures baseline versus treatment phase contrasts on untrained third person singular targets (extension measure)*

| Participant ID  | Kendall's <i>S</i> | <i>z</i> score | <i>p</i> value | Tau           | 90% CI       |
|-----------------|--------------------|----------------|----------------|---------------|--------------|
| P1              | 22                 | 1.47           | 0.14           | 0.49          | [-0.06,1]    |
| P2              | 44                 | 1.94           | >0.05          | 0.54          | [0.08,1]     |
| P3              | 12                 | 0.80           | 0.42           | 0.27          | [0.28, 0.82] |
| P4              | 53                 | 2.34           | 0.02*          | 0.65          | [0.19,1]     |
| P5              | -13                | -0.69          | 0.49           | -0.21         | [-0.70,0.29] |
| P6              | 24                 | 1.06           | 0.29           | 0.30          | [-0.16,0.76] |
| P7              | 21                 | 1.11           | 0.27           | 0.33          | [-0.16,0.83] |
| P8 <sup>a</sup> | -34                | -2.27          | 0.02*          | -0.76         | [-1,-0.21]   |
| P9              | 17                 | 0.90           | 0.37           | 0.27          | [-0.22,0.76] |
|                 |                    |                |                | Aggregated ES |              |
|                 |                    |                |                | .03           | 0.22         |

*Notes.* CI = confidence interval; ES = effect size

\*sig.

<sup>a</sup>unstable baseline corrected
