# Supplementary material
Source: publisher figshare collection journal article supplement (https://asha.figshare.com/articles/dataset/_/11958771)
Supplement: Supplementary file 6 [file 1]

## Supplemental Material S8.

*Summary of expressive repeated measures baseline versus treatment phase contrasts on untrained possessive 's targets (control measure)*

| Participant ID  | Kendall's <i>S</i> | <i>z</i> score | <i>p</i> value | Tau           | 90% CI        |
|-----------------|--------------------|----------------|----------------|---------------|---------------|
| P1              | 37                 | 2.47           | 0.01*          | 0.82          | [0.27,1]      |
| P2 <sup>a</sup> | -29                | -1.28          | 0.20           | -0.36         | [-0.82,0.10]  |
| P3              | 43                 | 2.87           | 0.004*         | 0.96          | [0.41,1]      |
| P4 <sup>a</sup> | 39                 | 1.72           | 0.08           | 0.48          | [0.02,0.94]   |
| P5              | -18                | -0.95          | 0.34           | -0.29         | [-0.78,0.21]  |
| P6              | -18                | -0.80          | 0.43           | -0.22         | [-0.68,0.24]  |
| P7              | -13                | -0.69          | 0.49           | -0.21         | [-0.70,0.29]  |
| P8              | 16                 | 1.07           | 0.29           | 0.36          | [-0.19, 0.90] |
| P9 <sup>a</sup> | -27                | -1.43          | 0.15           | -0.43         | [-0.92,0.07]  |
|                 |                    |                |                | Aggregated ES |               |
|                 |                    |                |                | .33           | 0.10          |

*Notes.* CI = confidence interval; ES = effect size

\*sig.

<sup>a</sup>unstable baseline corrected
