# Supplementary material
Source: publisher figshare collection journal article supplement (https://asha.figshare.com/articles/dataset/_/11958771)
Supplement: Supplementary file 7 [file 1]

## Supplemental Material S12.

*Grammaticality judgment raw scores of participants on untrained past-tense verbs*

| ID | Pre-treatment baseline |      |      |      |       |      |       |      |       | Intervention |      |      |      |      |      |      |       |       | Maintenance |       |       |       |       |  |
|----|------------------------|------|------|------|-------|------|-------|------|-------|--------------|------|------|------|------|------|------|-------|-------|-------------|-------|-------|-------|-------|--|
|    | A1                     | A2   | A3   | A4   | A5    | A6   | A7    | A8   | A9    | B2           | B3   | B4   | B5   | B6   | B7   | B8   | B9    | B10   | A11         | A12   | A13   | A14   | A15   |  |
| P1 | 17/30                  | 5/12 | 7/12 | 7/12 | 17/30 | -    | -     | -    | -     | 5/12         | 5/12 | 6/12 | 6/12 | 8/12 | 7/12 | 9/12 | 7/12  | 4/12  | 14/30       | 7/12  | 7/12  | 6/12  | 15/30 |  |
| P2 | 16/30                  | 5/12 | 5/12 | 8/12 | 7/12  | 9/12 | 7/12  | 6/12 | 16/30 | 9/12         | 7/12 | 8/12 | 9/12 | 7/12 | 8/12 | 9/12 | 8/12  | 10/12 | 24/30       | 11/12 | 12/12 | 9/12  | 28/30 |  |
| P3 | 14/30                  | 4/12 | 7/12 | 7/12 | 17/30 | -    | -     | -    | -     | 5/12         | 5/12 | 6/12 | 6/12 | 6/12 | 6/12 | 6/12 | 6/12  | 7/12  | 14/30       | 6/12  | 5/12  | 8/12  | 22/30 |  |
| P4 | 17/30                  | 5/12 | 6/12 | 6/12 | 4/12  | 9/12 | 8/12  | 7/12 | 18/30 | 8/12         | 7/12 | 7/12 | 6/12 | 7/12 | 6/12 | 8/12 | 10/12 | 11/12 | 28/30       | 10/12 | 10/12 | 9/12  | 26/30 |  |
| P5 | 13/30                  | 8/12 | 6/12 | 6/12 | 5/12  | 5/12 | 17/30 | -    | -     | 7/12         | 7/12 | 6/12 | 6/12 | 7/12 | 9/12 | 7/12 | 9/12  | 6/12  | 24/30       | 11/12 | 8/12  | 10/12 | 25/30 |  |
| P6 | 15/30                  | 7/12 | 6/12 | 6/12 | 6/12  | 5/12 | 6/12  | 5/12 | 15/30 | 9/12         | 6/12 | 5/12 | 6/12 | 9/12 | 4/12 | 6/12 | 5/12  | 4/12  | 17/30       | 7/12  | 5/12  | 6/12  | 16/30 |  |
| P7 | 12/30                  | 6/12 | 5/12 | 7/12 | 7/12  | 6/12 | 15/30 | -    | -     | 7/12         | 5/12 | 3/12 | 4/12 | 4/12 | 1/12 | 7/12 | 5/12  | 7/12  | 17/30       | 6/11  | 6/12  | 6/12  | 13/30 |  |
| P8 | 18/20                  | 8/12 | 9/12 | 5/12 | 15/30 | -    | -     | -    | -     | 8/12         | 6/12 | 6/12 | 6/12 | 6/12 | 6/12 | 6/12 | 6/12  | 6/12  | 16/30       | 3/12  | 6/12  | 7/12  | 9/30  |  |
| P9 | 15/30                  | 7/12 | 5/12 | 4/12 | 5/12  | 7/12 | 16/30 | -    | -     | 10/12        | 6/12 | 8/12 | 4/12 | 4/12 | 4/12 | 6/12 | 8/12  | 8/12  | 17/30       | 5/12  | 5/12  | 6/12  | 15/30 |  |
