# Supplementary material
Source: publisher figshare collection journal article supplement (https://asha.figshare.com/articles/dataset/_/11958771)
Supplement: Supplementary file 8 [file 1]

## Supplemental Material S10.

*Grammaticality judgment raw scores of participants on trained past-tense verbs within-session*

| Participant ID | B1    | B2   | B3   | B4   | B5   | B6    | B7    | B8   | B9    | B10   | Additional |
|----------------|-------|------|------|------|------|-------|-------|------|-------|-------|------------|
| P1             | 8/12  | 5/12 | 6/12 | 8/12 | 9/12 | 11/12 | 5/12  | 8/12 | 6/12  | 7/12  | -          |
| P2             | 6/12  | 6/12 | 6/12 | 7/12 | 5/12 | 9/12  | 7/12  | 9/12 | 10/12 | 9/12  | -          |
| P3             | 6/12  | 6/12 | 6/12 | 6/12 | 6/12 | 6/12  | 6/12  | 7/12 | 7/12  | 10/12 | -          |
| P4             | 5/12  | 8/12 | 5/12 | 7/12 | 6/12 | 6/12  | 6/12  | 9/12 | 12/12 | 11/12 | -          |
| P5             | 6/12  | 6/12 | 6/12 | 8/12 | 8/12 | 7/12  | 12/12 | -    | 9/12  | 8/12  | 9/12       |
| P6             | 6/12  | 2/12 | 7/12 | 7/12 | 7/12 | 6/12  | 8/12  | -    | 5/12  | 6/12  | 6/12       |
| P7             | 7/12  | 4/12 | 8/12 | -    | 5/12 | 6/12  | 7/12  | 6/12 | 6/12  | 9/12  | 10/12      |
| P8             | -     | 7/12 | 6/12 | 6/12 | 6/12 | 6/12  | 6/12  | 6/12 | 6/12  | 7/12  | 6/12       |
| P9             | 10/12 | 7/12 | 4/12 | -    | 6/12 | 3/12  | 4/12  | 7/12 | 5/12  | 6/12  | 6/12       |
