# Supplementary material
Source: publisher figshare collection journal article supplement (https://asha.figshare.com/articles/dataset/_/11958771)
Supplement: Supplementary file 10 [file 1]

## Supplemental Material S4.

*Expressive scores of participants on third person singular (extension measure)*

| ID | Pre-treatment baseline |     |     |     |      | Intervention |       |     |       |     |     |     |     |     |     | Maintenance |     |     |       |     |     |     |       |  |  |
|----|------------------------|-----|-----|-----|------|--------------|-------|-----|-------|-----|-----|-----|-----|-----|-----|-------------|-----|-----|-------|-----|-----|-----|-------|--|--|
|    | A1                     | A2  | A3  | A4  | A5   | A6           | A7    | A8  | A9    | B2  | B3  | B4  | B5  | B6  | B7  | B8          | B9  | B10 | A11   | A12 | A13 | A14 | A15   |  |  |
| P1 | 3/30                   | 2/9 | 2/9 | 0/9 | 1/30 | -            | -     | -   | -     | 0/9 | 0/9 | 1/9 | 0/9 | 1/9 | 0/9 | 0/9         | 0/9 | 0/9 | 5/30  | 3/9 | 6/9 | 4/9 | 25/30 |  |  |
| P2 | 15/30                  | 5/9 | 2/9 | 1/9 | 5/9  | 7/9          | 5/9   | 5/9 | 19/30 | 1/9 | 3/9 | 6/9 | 7/9 | 5/9 | 5/9 | 7/9         | 7/9 | 9/9 | 26/30 | 9/9 | 9/9 | 9/9 | 30/30 |  |  |
| P3 | 11/30                  | 0/9 | 1/9 | 0/9 | 3/30 | -            | -     | -   | -     | 2/9 | 0/9 | 2/9 | 0/9 | 0/9 | 1/9 | 1/9         | 1/9 | 2/9 | 13/30 | 7/9 | 8/9 | 6/9 | 27/30 |  |  |
| P4 | 7/30                   | 2/9 | 2/9 | 3/9 | 2/9  | 4/9          | 2/9   | 2/9 | 15/30 | 2/9 | 4/9 | 1/9 | 1/9 | 1/9 | 4/9 | 3/9         | 4/9 | 2/9 | 25/30 | 7/9 | 8/9 | 8/9 | 29/30 |  |  |
| P5 | 4/30                   | 0/9 | 1/9 | 1/9 | 0/9  | 0/9          | 1/30  | -   | -     | 1/9 | 0/9 | 1/9 | 0/9 | 0/9 | 0/9 | 0/9         | 0/9 | 0/9 | 1/30  | 1/9 | 0/9 | 1/9 | 1/30  |  |  |
| P6 | 7/30                   | 2/9 | 4/9 | 1/9 | 0/9  | 1/9          | 1/9   | 1/9 | 7/30  | 2/9 | 4/9 | 3/9 | 2/9 | 3/9 | 3/9 | 2/9         | 3/9 | 3/9 | 14/30 | 2/9 | 5/9 | 2/9 | 15/30 |  |  |
| P7 | 7/30                   | 1/9 | 3/9 | 3/9 | 5/9  | 5/9          | 12/30 | -   | -     | 2/9 | 2/9 | 5/9 | 2/9 | 5/9 | 5/9 | 4/9         | 4/9 | 5/9 | 20/30 | 7/9 | 5/9 | 7/9 | 15/30 |  |  |
| P8 | 2/30                   | 2/9 | 3/9 | 1/9 | 9/30 | -            | -     | -   | -     | 3/9 | 2/9 | 2/9 | 1/9 | 3/9 | 3/9 | 4/9         | 4/9 | 2/9 | 15/30 | 3/9 | 3/9 | 3/9 | 11/30 |  |  |
| P9 | 3/30                   | 3/9 | 4/9 | 4/9 | 2/9  | 6/9          | 14/30 | -   | -     | 1/9 | 4/9 | 1/9 | 2/9 | 5/9 | 1/9 | 0/9         | 1/9 | 2/9 | 16/30 | 5/9 | 5/9 | 4/9 | 8/30  |  |  |
