# Supplementary material
Source: publisher figshare collection journal article supplement (https://asha.figshare.com/articles/dataset/_/11958771)
Supplement: Supplementary file 11 [file 1]

## Supplemental Material S13.

*Summary of grammaticality judgment repeated measures baseline versus treatment phase contrasts on trained targets*

| Participant ID         | Kendall's <i>S</i> | <i>z</i> score | <i>p</i> value | Tau           | 90% CI        |
|------------------------|--------------------|----------------|----------------|---------------|---------------|
| <u>WITHIN SESSION</u>  |                    |                |                |               |               |
| P1                     | 18                 | 1.10           | 0.27           | 0.36          | [-0.18, 0.90] |
| P2                     | 20                 | 0.82           | 0.41           | 0.22          | [-0.23, 0.67] |
| P3                     | -14                | -0.86          | 0.39           | -0.28         | [-0.82, 0.26] |
| P4                     | 22                 | 0.97           | 0.33           | 0.27          | [-0.19, 0.73] |
| P5                     | 47                 | 2.29           | 0.02*          | 0.67          | [0.19, 1]     |
| P6                     | 25                 | 1.02           | 0.31           | 0.28          | [-0.17, 0.73] |
| P7                     | 15                 | 0.73           | 0.46           | 0.21          | [-0.27, 0.70] |
| P8                     | -6                 | -0.37          | 0.71           | -0.12         | [-0.66, 0.42] |
| P9                     | -2                 | -0.10          | 0.92           | -0.03         | [-0.51, 0.45] |
|                        |                    |                |                | Aggregated ES |               |
|                        | -                  | -              | 0.06           | 0.19          | -             |
| <u>BETWEEN SESSION</u> |                    |                |                |               |               |
| P1                     | 34                 | 2.08           | 0.04*          | 0.68          | [0.14, 1]     |
| P2                     | 29                 | 1.18           | 0.24           | 0.32          | [-0.13, 0.77] |
| P3                     | -10                | -0.61          | 0.54           | -0.20         | [-0.74, 0.34] |
| P4                     | 50                 | 2.04           | 0.04*          | 0.56          | [0.12, 1]     |
| P5                     | 23                 | 1.12           | 0.26           | 0.33          | [-0.15, 0.81] |
| P6                     | 5                  | 0.20           | 0.84           | 0.06          | [-0.39, 0.50] |
| P7                     | 14                 | 0.68           | 0.50           | 0.20          | [-0.28, 0.68] |
| P8                     | -6                 | -0.37          | 0.71           | -0.12         | [-0.64, 0.42] |
| P9                     | 33                 | 1.61           | 0.11           | 0.47          | [-0.01, 0.95] |
|                        |                    |                |                | Aggregated ES |               |
|                        | -                  | -              | 0.009          | 0.26          | -             |
| <u>UNTRAINED</u>       |                    |                |                |               |               |
| P1                     | 1                  | 0.07           | 0.95           | 0.02          | [-0.53, 0.57] |
| P2                     | 54                 | 2.38           | 0.02*          | 0.67          | [0.21, 1]     |
| P3                     | -23                | -1.53          | 0.12           | -0.51         | [-1, 0.04]    |

|    |     |       |       |               |               |
|----|-----|-------|-------|---------------|---------------|
| P4 | 32  | 1.41  | 0.16  | 0.40          | [-0.07, 0.86] |
| P5 | 37  | 1.96  | >0.05 | 0.59          | [0.09, 1]     |
| P6 | -8  | -0.35 | 0.72  | -0.10         | [-0.56, 0.36] |
| P7 | -25 | -1.32 | 0.19  | -0.40         | [-0.89, 0.10] |
| P8 | -6  | -0.40 | 0.69  | -0.13         | [-0.68, 0.42] |
| P9 | 12  | 0.64  | 0.53  | 0.19          | [-0.30, 0.68] |
|    |     |       |       | Aggregated ES |               |
|    | -   | -     | 0.35  | 0.01          | -             |

*Notes.* CI = confidence interval; ES = effect size.

\*sig.
