# Supplementary material
Source: publisher figshare collection journal article supplement (https://asha.figshare.com/articles/dataset/_/11958771)
Supplement: Supplementary file 12 [file 1]

## Supplemental Material S7.

*Expressive raw scores of participants on possessive ‘s (control measure)*

| Participant ID | Pre-treatment baseline |     |     |     |       |     |      |     |       | Intervention |     |     |     |     |     |     |     | Maintenance |       |     |     |     |       |
|----------------|------------------------|-----|-----|-----|-------|-----|------|-----|-------|--------------|-----|-----|-----|-----|-----|-----|-----|-------------|-------|-----|-----|-----|-------|
|                | A1                     | A2  | A3  | A4  | A5    | A6  | A7   | A8  | A9    | B2           | B3  | B4  | B5  | B6  | B7  | B8  | B9  | B10         | A11   | A12 | A13 | A14 | A15   |
| P1             | 13/30                  | 5/9 | 4/9 | 4/9 | 15/30 | -   | -    | -   | -     | 6/9          | 4/9 | 6/9 | 6/9 | 6/9 | 6/9 | 5/9 | 6/9 | 5/9         | 21/30 | 6/9 | 7/9 | 6/9 | 21/30 |
| P2             | 16/30                  | 4/9 | 5/9 | 5/9 | 6/9   | 6/9 | 8/9  | 8/9 | 17/30 | 3/9          | 5/9 | 5/9 | 5/9 | 4/9 | 8/9 | 9/9 | 5/9 | 8/9         | 25/30 | 9/9 | 9/9 | 9/9 | 29/30 |
| P3             | 18/30                  | 2/9 | 2/9 | 3/9 | 10/30 | -   | -    | -   | -     | 6/9          | 4/9 | 5/9 | 7/9 | 5/9 | 6/9 | 6/9 | 6/9 | 5/9         | 19/30 | 9/9 | 7/9 | 9/9 | 27/30 |
| P4             | 15/30                  | 7/9 | 5/9 | 6/9 | 7/9   | 8/9 | 7/9  | 9/9 | 24/30 | 6/9          | 9/9 | 9/9 | 9/9 | 9/9 | 9/9 | 9/9 | 9/9 | 9/9         | 27/30 | 8/9 | 9/9 | 8/9 | 29/30 |
| P5             | 14/30                  | 0/9 | 1/9 | 1/9 | 0/9   | 0/9 | 0/30 | -   | -     | 0/9          | 0/9 | 0/9 | 0/9 | 0/9 | 0/9 | 0/9 | 0/9 | 0/9         | 23/30 | 9/9 | 9/9 | 9/9 | 30/30 |
| P6             | 13/30                  | 2/9 | 0/9 | 1/9 | 1/9   | 0/9 | 1/9  | 1/9 | 0/30  | 1/9          | 0/9 | 0/9 | 0/9 | 1/9 | 0/9 | 1/9 | 0/9 | 0/9         | 2/30  | 1/9 | 1/9 | 1/9 | 2/30  |
| P7             | 15/30                  | 2/9 | 1/9 | 1/9 | 0/9   | 1/9 | 4/30 | -   | -     | 1/9          | 1/9 | 2/9 | 0/9 | 1/9 | 0/9 | 1/9 | 0/9 | 3/9         | 16/30 | 3/9 | 2/9 | 2/9 | 8/30  |
| P8             | 15/30                  | 3/9 | 6/9 | 4/9 | 17/30 | -   | -    | -   | -     | 6/9          | 5/9 | 6/9 | 3/9 | 6/9 | 6/9 | 4/9 | 5/9 | 6/9         | 20/30 | 7/9 | 7/9 | 6/9 | 19/30 |
| P9             | 13/30                  | 1/9 | 2/9 | 1/9 | 0/9   | 0/9 | 0/30 | -   | -     | 0/9          | 0/9 | 0/9 | 0/9 | 0/9 | 0/9 | 0/9 | 0/9 | 0/9         | 1/30  | 0/9 | 0/9 | 0/9 | 0/30  |
