# Supplementary material
Source: publisher figshare collection journal article supplement (https://asha.figshare.com/articles/dataset/_/11958771)
Supplement: Supplementary file 13 [file 1]

## Supplemental Material S3.

### *Expressive raw scores of participants on untrained past-tense verbs*

| ID | Pre-treatment baseline |     |     |     |       |     |       |     |       | Intervention |     |     |     |     |     |     |     |     |       | Maintenance |     |     |       |  |
|----|------------------------|-----|-----|-----|-------|-----|-------|-----|-------|--------------|-----|-----|-----|-----|-----|-----|-----|-----|-------|-------------|-----|-----|-------|--|
|    | A1                     | A2  | A3  | A4  | A5    | A6  | A7    | A8  | A9    | B2           | B3  | B4  | B5  | B6  | B7  | B8  | B9  | B10 | A10   | A11         | A12 | A13 | A14   |  |
| P1 | 11/30                  | 1/9 | 1/9 | 0/9 | 2/30  | -   | -     | -   | -     | 3/9          | 3/9 | 2/9 | 5/9 | 3/9 | 6/9 | 1/9 | 5/9 | 6/9 | 22/30 | 9/9         | 8/9 | 7/9 | 20/30 |  |
| P2 | 12/30                  | 0/9 | 1/9 | 1/9 | 0/9   | 1/9 | 5/9   | 2/9 | 9/30  | 5/9          | 8/9 | 8/9 | 5/9 | 6/9 | 7/9 | 8/9 | 6/9 | 9/9 | 27/30 | 9/9         | 8/9 | 9/9 | 30/30 |  |
| P3 | 10/30                  | 2/9 | 3/9 | 1/9 | 3/30  | -   | -     | -   | -     | 2/9          | 4/9 | 5/9 | 0/9 | 3/9 | 5/9 | 2/9 | 5/9 | 6/9 | 28/30 | 9/9         | 7/9 | 7/9 | 26/30 |  |
| P4 | 9/30                   | 3/9 | 2/9 | 3/9 | 4/9   | 3/9 | 3/9   | 4/9 | 16/30 | 5/9          | 4/9 | 6/9 | 6/9 | 5/9 | 7/9 | 9/9 | 7/9 | 8/9 | 29/30 | 7/9         | 9/9 | 7/9 | 28/30 |  |
| P5 | 1/30                   | 1/9 | 0/9 | 1/9 | 1/9   | 0/9 | 2/30  | -   | -     | 0/9          | 1/9 | 2/9 | 1/9 | 4/9 | 5/9 | 4/9 | 7/9 | 8/9 | 29/30 | 9/9         | 9/9 | 8/9 | 30/30 |  |
| P6 | 1/30                   | 2/9 | 1/9 | 1/9 | 0/9   | 0/9 | 0/9   | 1/9 | 2/30  | 2/9          | 2/9 | 4/9 | 4/9 | 1/9 | 2/9 | 4/9 | 3/9 | 3/9 | 12/30 | 4/8         | 2/9 | 3/9 | 8/30  |  |
| P7 | 7/30                   | 1/9 | 2/9 | 4/9 | 3/9   | 0/9 | 14/30 | -   | -     | 5/9          | 2/9 | 6/9 | 3/9 | 7/9 | 7/9 | 3/9 | 9/9 | 5/9 | 21/30 | 8/9         | 5/9 | 6/9 | 19/30 |  |
| P8 | 5/30                   | 1/9 | 3/9 | 5/9 | 13/30 | -   | -     | -   | -     | 2/9          | 2/9 | 5/9 | 4/9 | 4/9 | 4/9 | 2/9 | 5/9 | 7/9 | 24/30 | 6/9         | 6/9 | 6/9 | 23/30 |  |
| P9 | 11/30                  | 3/9 | 3/9 | 2/9 | 1/9   | 1/9 | 4/30  | -   | -     | 1/9          | 1/9 | 1/9 | 1/9 | 2/9 | 1/9 | 2/9 | 1/9 | 4/9 | 14/30 | 5/9         | 4/9 | 1/9 | 13/30 |  |
