# Supplementary material
Source: publisher figshare collection journal article supplement (https://asha.figshare.com/articles/dataset/_/11958771)
Supplement: Supplementary file 14 [file 1]

## Supplemental Material S17.

*Grammaticality judgment raw scores of participants on third person singular (extension measure)*

| Participant ID |       | Pre-treatment baseline |      |      |       |      |       |      |       |       |       | Intervention |      |       |       |       |       | Maintenance |       |       |       |       |       |
|----------------|-------|------------------------|------|------|-------|------|-------|------|-------|-------|-------|--------------|------|-------|-------|-------|-------|-------------|-------|-------|-------|-------|-------|
|                | A1    | A2                     | A3   | A4   | A5    | A6   | A7    | A8   | A9    | B2    | B3    | B4           | B5   | B6    | B7    | B8    | B9    | B10         | A11   | A12   | A13   | A14   | A15   |
| P1             | 16/30 | 8/12                   | 5/12 | 5/12 | 14/30 | -    | -     | -    | -     | 7/12  | 10/12 | 8/12         | 7/12 | 6/12  | 6/12  | 6/12  | 7/12  | 6/12        | 14/30 | 6/12  | 6/12  | 6/12  | 17/30 |
| P2             | 16/30 | 2/12                   | 8/12 | 7/12 | 10/12 | 7/12 | 7/12  | 7/12 | 23/30 | 7/12  | 7/12  | 8/12         | 7/12 | 10/12 | 11/12 | 12/12 | 11/12 | 10/12       | 30/30 | 12/12 | 11/12 | 11/12 | 27/30 |
| P3             | 15/30 | 7/12                   | 5/12 | 4/12 | 16/30 | -    | -     | -    | -     | 7/12  | 5/12  | 6/12         | 6/12 | 6/12  | 6/12  | 6/12  | 6/12  | 7/12        | 15/30 | 7/12  | 5/12  | 7/12  | 20/30 |
| P4             | 21/30 | 8/12                   | 8/12 | 7/12 | 7/12  | 6/12 | 7/12  | 8/12 | 18/30 | 10/12 | 7/12  | 9/12         | 9/12 | 8/12  | 8/12  | 7/12  | 12/12 | 11/12       | 26/30 | 12/12 | 10/12 | 10/12 | 27/30 |
| P5             | 14/30 | 7/12                   | 7/12 | 4/12 | 5/12  | 8/12 | 14/30 | -    | -     | 4/12  | 4/12  | 7/12         | 7/12 | 7/12  | 5/12  | 4/12  | 9/12  | 2/12        | 12/30 | 8/12  | 7/12  | 4/12  | 25/30 |
| P6             | 15/30 | 5/12                   | 6/12 | 8/12 | 5/12  | 7/12 | 6/12  | 5/12 | 15/30 | 6/12  | 5/12  | 8/12         | 6/12 | 7/12  | 6/12  | 7/12  | 6/12  | 7/12        | 15/30 | 5/12  | 5/12  | 6/12  | 15/30 |
| P7             | 9/30  | 6/12                   | 4/12 | 8/12 | 1/12  | 4/12 | 19/30 | -    | -     | 7/12  | 6/12  | 6/12         | 2/12 | 8/12  | 9/12  | 6/12  | 7/12  | 5/12        | 17/30 | 5/12  | 7/12  | 9/12  | 16/30 |
| P8             | 13/30 | 8/12                   | 7/12 | 8/12 | 18/30 | -    | -     | -    | -     | 8/12  | 5/12  | 5/12         | 5/12 | 6/12  | 6/12  | 6/12  | 6/12  | 6/12        | 15/30 | 7/12  | 3/12  | 9/12  | 11/30 |
| P9             | 14/30 | 5/12                   | 9/12 | 4/12 | 5/12  | 7/12 | 17/30 | -    | -     | 7/12  | 10/12 | 4/12         | 9/12 | 7/12  | 6/12  | 4/12  | 7/12  | 7/12        | 15/30 | 9/12  | 5/12  | 5/12  | 13/30 |
