# Supplementary material
Source: publisher figshare collection journal article supplement (https://asha.figshare.com/articles/dataset/_/11958771)
Supplement: Supplementary file 15 [file 1]

## Supplemental Material S5.

*Summary expressive repeated measures baseline versus treatment phase contrasts on untrained third person singular targets (extension measure)*

| Participant ID  | Kendall's <i>S</i> | <i>z</i> score | <i>p</i> value | Tau           | 90% CI       |
|-----------------|--------------------|----------------|----------------|---------------|--------------|
| P1              | -26                | -1.73          | 0.08           | -0.58         | [-1,-0.03]   |
| P2              | 29                 | 1.28           | 0.20           | 0.36          | [-0.10,0.82] |
| P3              | 6                  | 0.40           | 0.69           | 0.13          | [-0.42,0.68] |
| P4              | -13                | -0.57          | 0.57           | -0.16         | [-0.62,0.30] |
| P5              | -22                | -1.16          | 0.24           | -0.35         | [-0.84,0.14] |
| P6              | 49                 | 2.16           | 0.03*          | 0.61          | [0.15,1]     |
| P7 <sup>a</sup> | -2                 | -0.11          | 0.92           | -0.03         | [-0.53,0.46] |
| P8 <sup>a</sup> | 8                  | 0.53           | 0.59           | 0.18          | [-0.37,0.73] |
| P9 <sup>a</sup> | -41                | -2.17          | 0.03           | -0.65         | [-1,-0.16]   |
|                 |                    |                |                | Aggregated ES |              |
|                 |                    |                |                | .65           | -0.05        |

*Notes.* CI = confidence interval; ES = effect size

\*sig. <sup>a</sup>unstable baseline corrected
